# Supplementary material
Source: PubMed Central journal article supplement (PMC2522256)
Supplement: pmed.0050178.st001.pdf [file pmed.0050178.st001.pdf]

**Table S1. Data used for Analysis** (for “Effect of the California Tobacco Control Program on Personal Health Care Expenditures” by James Lightwood, Alexis Dinno, and Stanton Glantz)

| Year <sup>a</sup> | Annual per capita personal health care expenditures <sup>b</sup> (2004\$) |                             | Cigarette sales <sup>c</sup> (packs per capita) |                |            | Price of cigarettes <sup>c</sup> (2004\$/pack) |                | Annual Tobacco Control Program Expenditures (2004\$ per capita) |                             | California population <sup>d</sup> (million) |
|-------------------|---------------------------------------------------------------------------|-----------------------------|-------------------------------------------------|----------------|------------|------------------------------------------------|----------------|-----------------------------------------------------------------|-----------------------------|----------------------------------------------|
|                   | California <sup>e</sup>                                                   | Control States <sup>f</sup> | California                                      | Control States | Difference | California                                     | Control States | California <sup>g</sup>                                         | Control States <sup>h</sup> |                                              |
| 1980              | 4497                                                                      | 3650                        | 120.2                                           | 136.6          | 16.4       | 1.51                                           | 1.41           | 0.00                                                            | 0.00                        | 23.7                                         |
| 1981              | 4582                                                                      | 3793                        | 118.6                                           | 136.0          | 17.4       | 1.52                                           | 1.41           | 0.00                                                            | 0.00                        | 24.3                                         |
| 1982              | 4475                                                                      | 3787                        | 115.4                                           | 135.1          | 19.7       | 1.66                                           | 1.56           | 0.00                                                            | 0.00                        | 24.8                                         |
| 1983              | 4453                                                                      | 3805                        | 110.8                                           | 130.9          | 20.1       | 1.80                                           | 1.70           | 0.00                                                            | 0.00                        | 25.4                                         |
| 1984              | 4526                                                                      | 3887                        | 104.8                                           | 124.8          | 20.0       | 1.78                                           | 1.73           | 0.00                                                            | 0.00                        | 25.8                                         |
| 1985              | 4659                                                                      | 4002                        | 102.8                                           | 123.6          | 20.8       | 1.83                                           | 1.78           | 0.00                                                            | 0.00                        | 26.4                                         |
| 1986              | 4598                                                                      | 4019                        | 99.7                                            | 121.1          | 21.4       | 1.79                                           | 1.86           | 0.00                                                            | 0.02                        | 27.1                                         |
| 1987              | 4584                                                                      | 4085                        | 97.5                                            | 118.4          | 20.9       | 1.95                                           | 1.92           | 0.00                                                            | 0.02                        | 27.8                                         |
| 1988              | 4600                                                                      | 4232                        | 90.1                                            | 114.2          | 24.1       | 2.01                                           | 2.01           | 0.00                                                            | 0.02                        | 28.5                                         |
| 1989              | 4529                                                                      | 4336                        | 82.4                                            | 110.7          | 28.3       | 2.50                                           | 2.11           | 0.00                                                            | 0.02                        | 29.2                                         |
| 1990              | 4506                                                                      | 4420                        | 77.8                                            | 106.1          | 28.3       | 2.70                                           | 2.12           | 6.38                                                            | 0.04                        | 29.9                                         |
| 1991              | 4497                                                                      | 4451                        | 68.7                                            | 104.3          | 35.6       | 2.80                                           | 2.32           | 4.42                                                            | 0.04                        | 30.4                                         |
| 1992              | 4438                                                                      | 4463                        | 67.5                                            | 102.8          | 35.3       | 2.76                                           | 2.38           | 3.47                                                            | 0.06                        | 30.9                                         |
| 1993              | 4302                                                                      | 4450                        | 63.4                                            | 102.2          | 38.8       | 2.48                                           | 2.09           | 3.21                                                            | 0.09                        | 31.1                                         |
| 1994              | 4242                                                                      | 4424                        | 58.6                                            | 100.5          | 41.9       | 2.49                                           | 2.08           | 2.63                                                            | 0.14                        | 31.3                                         |
| 1995              | 4229                                                                      | 4465                        | 56.4                                            | 101.3          | 44.9       | 2.45                                           | 2.08           | 2.33                                                            | 0.17                        | 31.5                                         |
| 1996              | 4191                                                                      | 4524                        | 54.5                                            | 100.0          | 45.5       | 2.41                                           | 2.09           | 2.01                                                            | 0.15                        | 31.8                                         |
| 1997              | 4210                                                                      | 4624                        | 53.8                                            | 100.1          | 46.3       | 2.45                                           | 2.16           | 2.01                                                            | 0.15                        | 31.8                                         |
| 1997              | 4210                                                                      | 4624                        | 53.8                                            | 100.1          | 46.3       | 2.45                                           | 2.16           | 4.79                                                            | 0.17                        | 32.2                                         |
| 1998              | 4304                                                                      | 4675                        | 52.3                                            | 99.3           | 47.0       | 2.61                                           | 2.38           | 4.93                                                            | 0.21                        | 32.7                                         |
| 1999              | 4274                                                                      | 4641                        | 47.2                                            | 95.0           | 47.8       | 3.98                                           | 3.13           | 4.93                                                            | 0.21                        | 32.7                                         |
| 1999              | 4274                                                                      | 4641                        | 47.2                                            | 95.0           | 47.8       | 3.98                                           | 3.13           | 3.60                                                            | 0.55                        | 33.5                                         |
| 2000              | 4281                                                                      | 4725                        | 41.6                                            | 90.1           | 48.5       | 4.01                                           | 3.21           | 3.60                                                            | 0.55                        | 33.5                                         |
| 2000              | 4281                                                                      | 4725                        | 41.6                                            | 90.1           | 48.5       | 4.01                                           | 3.21           | 2.92                                                            | 0.77                        | 34.0                                         |
| 2001              | 4341                                                                      | 4880                        | 38.0                                            | 86.9           | 48.9       | 4.25                                           | 3.39           | 2.92                                                            | 0.77                        | 34.0                                         |
| 2001              | 4341                                                                      | 4880                        | 38.0                                            | 86.9           | 48.9       | 4.25                                           | 3.39           | 3.79                                                            | 1.47                        | 34.6                                         |
| 2002              | 4386                                                                      | 5009                        | 35.8                                            | 84.7           | 48.9       | 4.28                                           | 3.64           | 3.79                                                            | 1.47                        | 34.6                                         |
| 2002              | 4386                                                                      | 5009                        | 35.8                                            | 84.7           | 48.9       | 4.28                                           | 3.64           | 4.03                                                            | 2.27                        | 35.0                                         |
| 2003              | 4600                                                                      | 5134                        | 34.7                                            | 81.6           | 46.9       | 4.06                                           | 3.58           | 4.03                                                            | 2.27                        | 35.0                                         |
| 2003              | 4600                                                                      | 5134                        | 34.7                                            | 81.6           | 46.9       | 4.06                                           | 3.58           | 2.69                                                            | 2.49                        | 35.5                                         |
| 2004              | 4666                                                                      | 5221                        | 33.1                                            | 78.6           | 45.5       | 3.84                                           | 3.50           | 2.69                                                            | 2.49                        | 35.5                                         |
| 2004              | 4666                                                                      | 5221                        | 33.1                                            | 78.6           | 45.5       | 3.84                                           | 3.50           | 2.42                                                            | 2.04                        | 35.8                                         |

<sup>a</sup> Calendar year for health care expenditures (e.g., 1980), fiscal year (e.g., 1979-80) for other variables.

<sup>b</sup> Centers for Medicaid and Medicare Services [1]

<sup>c</sup> *The Tax Burden on Tobacco: 2006: Historical Compilation 2005* [2], and include state and federal, but not local taxes.

<sup>d</sup> U.S. Bureau of the Census July estimates [1,3]

<sup>e</sup> Following the California Department of Finance [4], we used a population weighted average of the MCPI’s for the Los Angeles-Long Beach-Riverside, San Francisco-Oakland-San Jose, and San Diego [5,6,7,8], which include about 85% of the state population, for California

<sup>f</sup> Alabama, Arkansas, Colorado, Connecticut, Delaware, Georgia, Idaho, Illinois, Indiana, Iowa, Kansas, Kentucky, Louisiana, Maine, Minnesota, Mississippi, Missouri, Montana, Nebraska, Nevada, New Hampshire, New Mexico, North Carolina, North Dakota, Ohio, Oklahoma, Pennsylvania, Rhode Island, South Carolina, South Dakota, Tennessee, Texas, Utah, Vermont, Virginia, West Virginia, Wisconsin and Wyoming

<sup>g</sup> California Department of Health Services Tobacco Control Section and Department of Education expenditures from California Tobacco Tax Surtax Fund (Proposition 99) Health Education Account [9]

<sup>h</sup> Money from state funds, the US Centers for Disease Control and Prevention, and the National Cancer Institute ASSIST program [10].

## REFERENCES

1. Centers for Medicare and Medicaid Services (2007) Health expenditures by state of provider: Summary Tables, 1980-2004 (Final, February 2007) (PDF). [http://www.cms.hhs.gov/NationalHealthExpendData/05\\_NationalHealthAccountsStateHealthAccounts.asp#TopOfPage](http://www.cms.hhs.gov/NationalHealthExpendData/05_NationalHealthAccountsStateHealthAccounts.asp#TopOfPage) Accessed May 5, 2007.
2. Orzechowski & Walker (2005) Tax Burden on Tobacco: Historical Compilation: Orzechowski & Walker.
3. Statistics BoL (2007) Consumer Price Index - All Urban Consumers (Current Series). Bureau of Labor Statistics. <http://data.bls.gov/PDQ/outside.jsp?survey=cu> May
4. California Department of Finance (2007) California Statistical Abstract, Table D-16 — Consumer Price Indexes, All Items, Selected Areas (excel file). [http://www.dof.ca.gov/HTML/FS\\_DATA/STAT-ABS/documents/D16.xls](http://www.dof.ca.gov/HTML/FS_DATA/STAT-ABS/documents/D16.xls) Accessed December 8, 2007.
5. California Department of Finance Demographic Research Unit (2003) E-4 Historical Population Estimates for California Cities and Counties, 1971-1980, with 1970 and 1980 Census Counts. <http://www.dof.ca.gov/HTML/DEMOGRAP/ReportsPapers/Estimates/E4/E4-70-80/E4CALL.HTM> Accessed July 1, 2007.
6. California Department of Finance Demographic Research Unit (2003) E-4 Historical Population Estimates for Cities, Counties and the State, 1981-1990. <http://www.dof.ca.gov/HTML/DEMOGRAP/ReportsPapers/Estimates/E4/E4-81-90/e-4text.php> Accessed July 1, 2007.
7. California Department of Finance Demographic Research Unit (2003) E-4 Historical population Estimates for Cities, Counties and the State, 1991-2000, with 1990 and 2000 Census Counts. <http://www.dof.ca.gov/HTML/DEMOGRAP/ReportsPapers/Estimates/E4/E4-91-00/E-4text2.php> Accessed July 1, 2007.
8. California Department of Finance Demographic Research Unit (2003) E-4 Population Estimates for Cities, Counties and the State, 2001-2007, with 2000 Benchmark. California Department of Finance, Demographic Research Unit. <http://www.dof.ca.gov/HTML/DEMOGRAP/ReportsPapers/Estimates/E4/E4-01-06/HistE-4.php> Accessed July 1, 2007.
9. California Department of Health Services (2007) Proposition 99 Health Education Account, TCS Funding, CDE, and TRDRDP Budget Appropriation Summary.
10. Farrelly MC, Pechacek TF, Thomas KY, Nelson D (2008) The impact of tobacco control programs on adult smoking. Am J Public Health 98: 304-309.
